# Supplementary material
Source: PubMed Central journal article supplement (PMC4649632)
Supplement: supp_115.179176_FigureS1.pdf [file supp_115.179176_FigureS1.pdf]

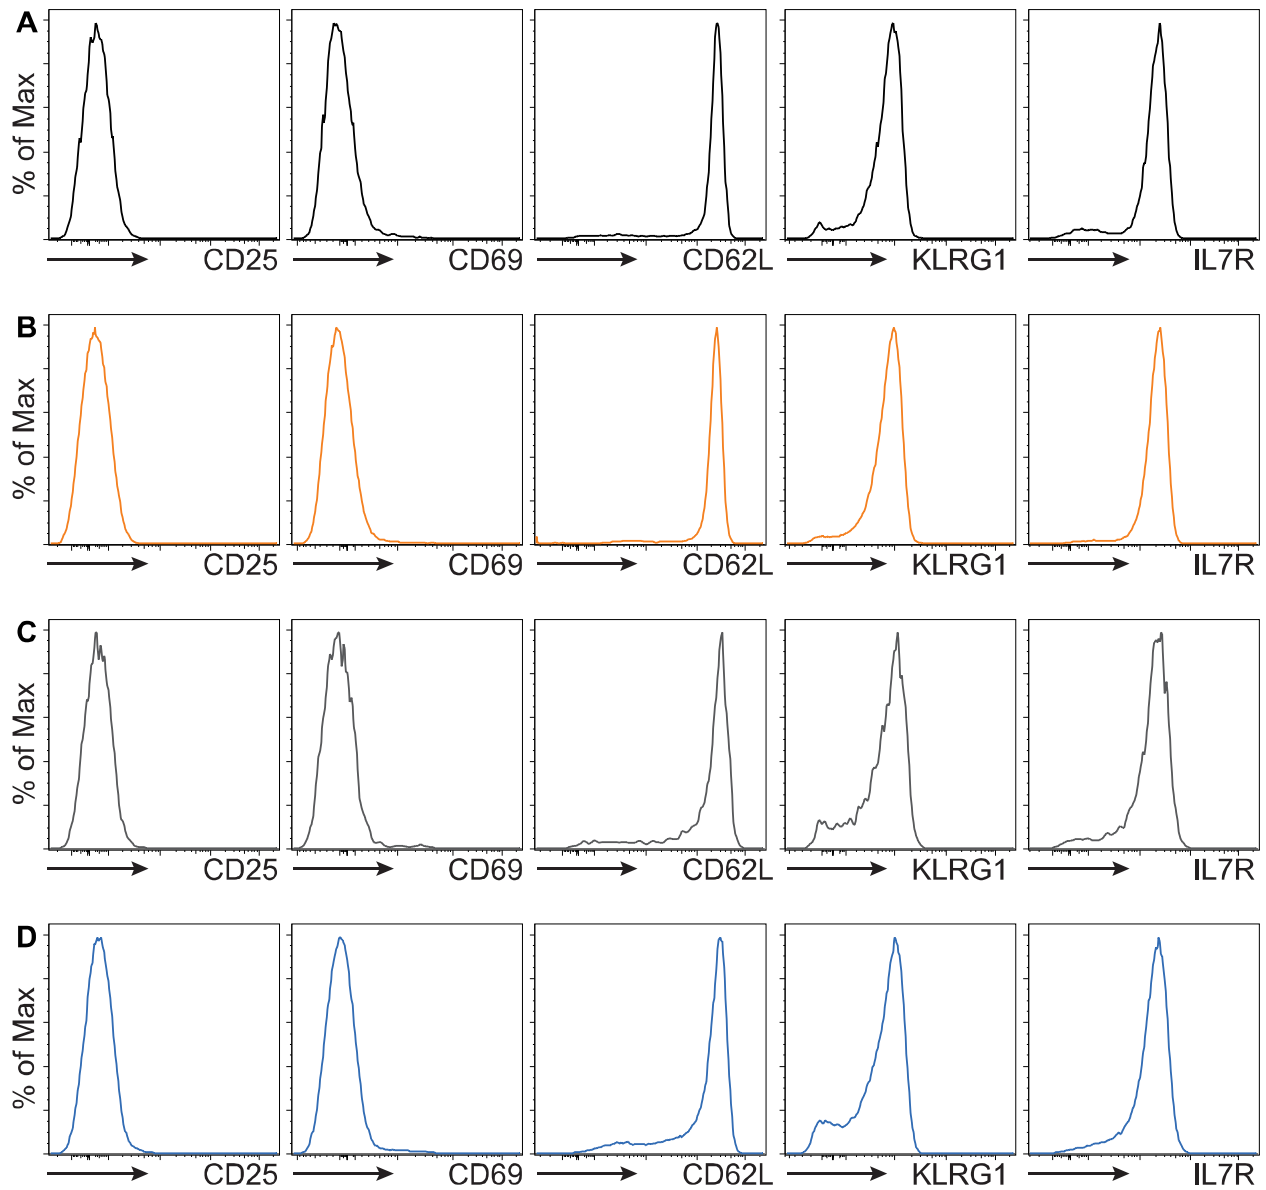

**Figure S1 Adult and neonatal CD8+ T cells have equivalent phenotypes before and after selection.** Representative histograms show expression of IL2RA/CD25 (associated with activation), CD69 (associated with activation), SELL/CD62L (marker of lymph homing), KLRG1 (marker of SLECs), and IL7R (marker of MPECs) in naive CD8+ cells from (A) adults pre-selection, (B) adults post-selection, (C) neonates pre-selection, and (D) neonates post-selection.
