# Supplementary material
Source: PubMed Central journal article supplement (PMC4649632)
Supplement: supp_115.179176_FigureS3.pdf [file supp_115.179176_FigureS3.pdf]

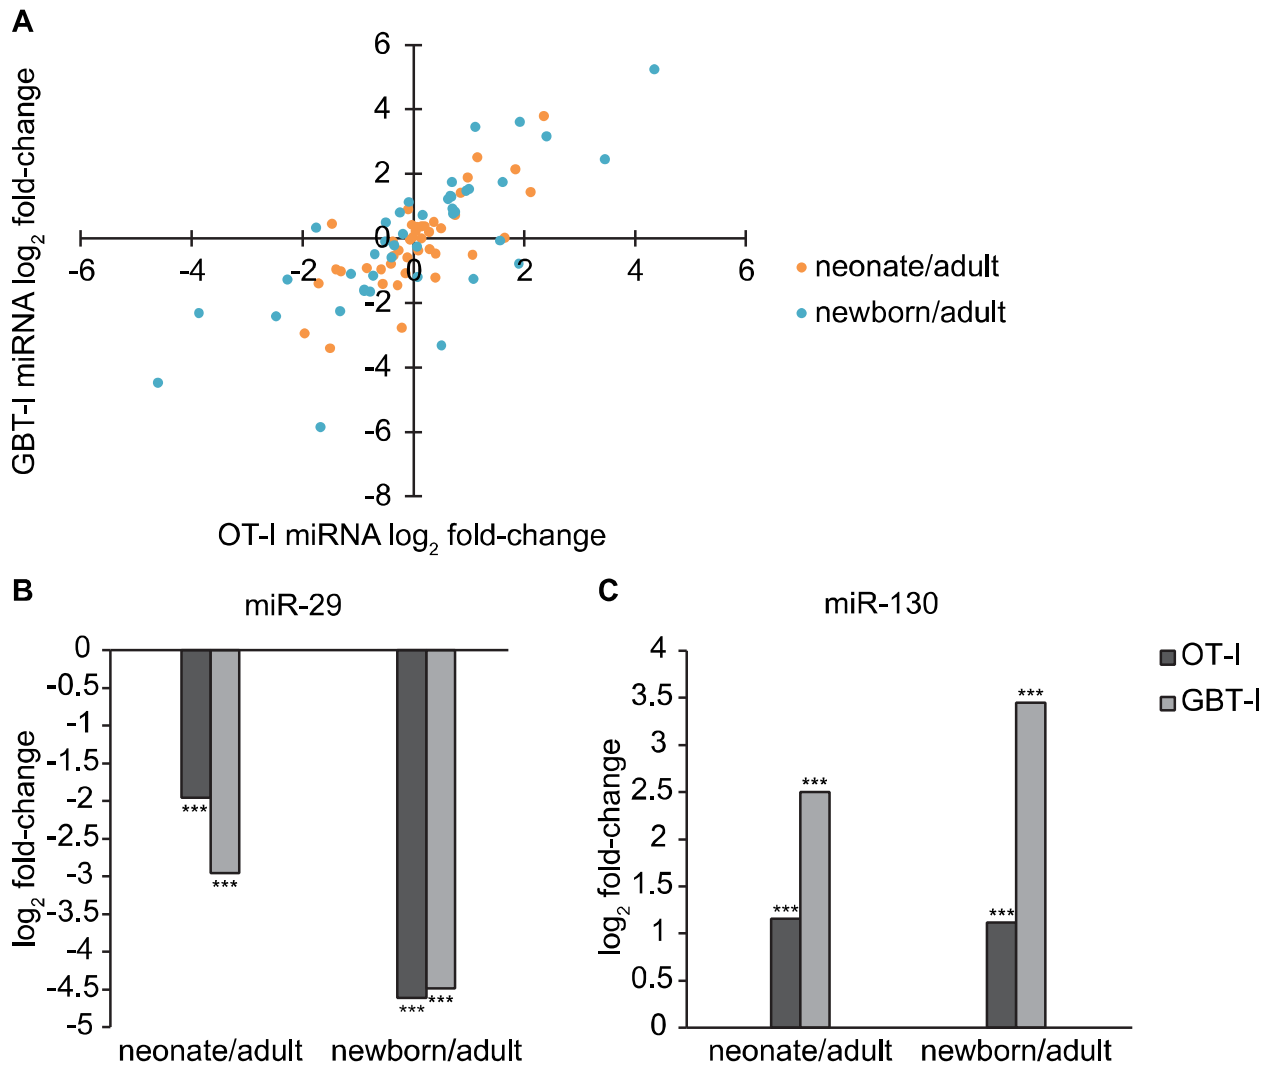

**Figure S3 CD8+ T cells from two transgenic TCR mouse strains have similar age-dependent miRNA expression differences.** (A) Correlation of fold-changes in neonatal:adult (Pearson  $r=0.753$ ) and newborn:adult (Pearson  $r=0.765$ ) miRNA expression between gBT-I and OT-I naive CD8+ T cell biological replicates. Fold-change values were calculated with edgeR; each sample corresponded to two biological replicates, except the gBT-I newborn, which had one. (B) Fold-change in expression of miR-29a between adults and neonates, or adults and newborns, for OT-I and gBT-I naive CD8+ T cells. Differential expression was determined by edgeR; \*\*\*= $p<0.0005$ . (C) Fold-change in expression of miR-130b between adults and neonates, or adults and newborns, for OT-I and gBT-I naive CD8+ T cells. Differential expression was determined by edgeR; \*\*\*= $p<0.0005$ .
