# Supplementary material
Source: PubMed Central journal article supplement (PMC4649632)
Supplement: supp_115.179176_FigureS4.pdf [file supp_115.179176_FigureS4.pdf]

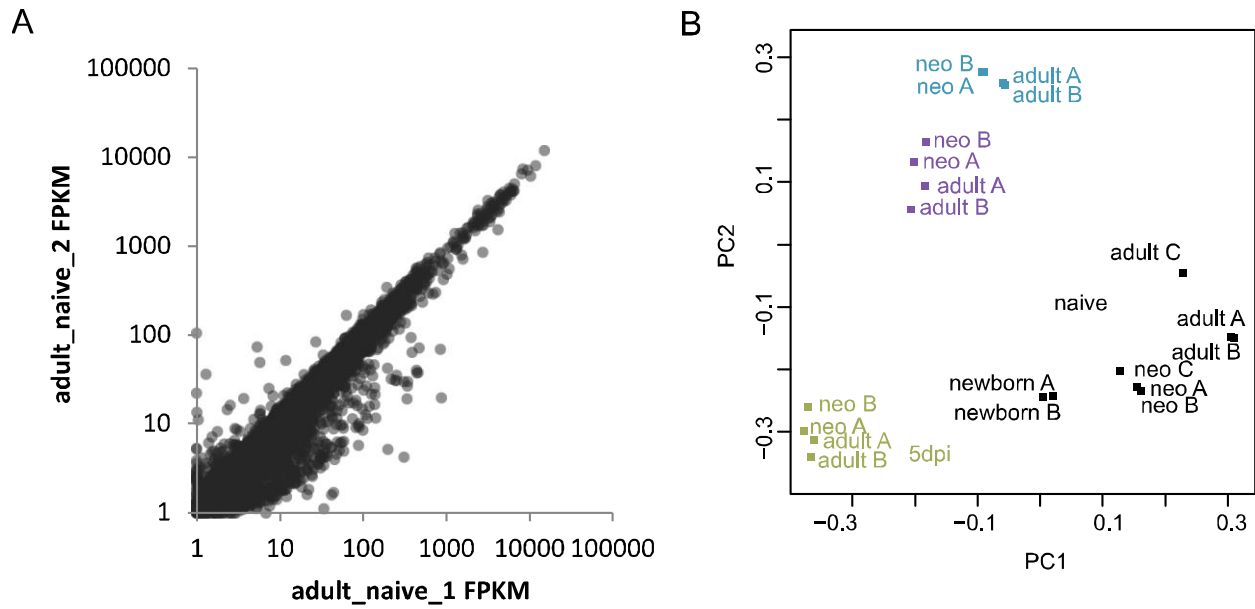

| Replicate 1     | Replicate 2     | Pearson R | Pearson p value    | Spearman p | Spearman p value   |
|-----------------|-----------------|-----------|--------------------|------------|--------------------|
| adult_naive_0   | adult_naive_1   | 0.99891   | <10 <sup>-15</sup> | 0.99573    | <10 <sup>-15</sup> |
| adult_naive_0   | adult_naive_2   | 0.98925   | <10 <sup>-15</sup> | 0.96091    | <10 <sup>-15</sup> |
| adult_naive_1   | adult_naive_2   | 0.98826   | <10 <sup>-15</sup> | 0.96041    | <10 <sup>-15</sup> |
| adult_5dpi_0    | adult_5dpi_1    | 0.99823   | <10 <sup>-15</sup> | 0.99763    | <10 <sup>-15</sup> |
| adult_7dpi_0    | adult_7dpi_1    | 0.99824   | <10 <sup>-15</sup> | 0.99651    | <10 <sup>-15</sup> |
| adult_15dpi_0   | adult_15dpi_1   | 0.99954   | <10 <sup>-15</sup> | 0.99823    | <10 <sup>-15</sup> |
| neonate_naive_0 | neonate_naive_1 | 0.99769   | <10 <sup>-15</sup> | 0.99009    | <10 <sup>-15</sup> |
| neonate_naive_0 | neonate_naive_2 | 0.99408   | <10 <sup>-15</sup> | 0.98841    | <10 <sup>-15</sup> |
| neonate_naive_1 | neonate_naive_2 | 0.99207   | <10 <sup>-15</sup> | 0.98722    | <10 <sup>-15</sup> |
| neonate_5dpi_0  | neonate_5dpi_1  | 0.99515   | <10 <sup>-15</sup> | 0.9964     | <10 <sup>-15</sup> |
| neonate_7dpi_0  | neonate_7dpi_1  | 0.99434   | <10 <sup>-15</sup> | 0.99671    | <10 <sup>-15</sup> |
| neonate_15dpi_0 | neonate_15dpi_1 | 0.99891   | <10 <sup>-15</sup> | 0.99785    | <10 <sup>-15</sup> |
| newborn_naive_0 | newborn_naive_1 | 0.99870   | <10 <sup>-15</sup> | 0.99558    | <10 <sup>-15</sup> |

**Figure S4 mRNA profiles determined by high-throughput sequencing compared between biological replicate samples. (A)** Genes that were well-expressed (FPKM>1 in at least one sample) were used; expression values (FPKM) for well-expressed genes (11,360) are shown for two biological replicates. **(B)** Principal component analysis was performed on all replicate samples for well-expressed genes. **(C)** Pearson and Spearman correlation coefficients for all pairs of biological replicates that underwent mRNA sequencing.
