# Supplementary material
Source: PubMed Central journal article supplement (PMC4649632)
Supplement: supp_115.179176_FigureS6.pdf [file supp_115.179176_FigureS6.pdf]

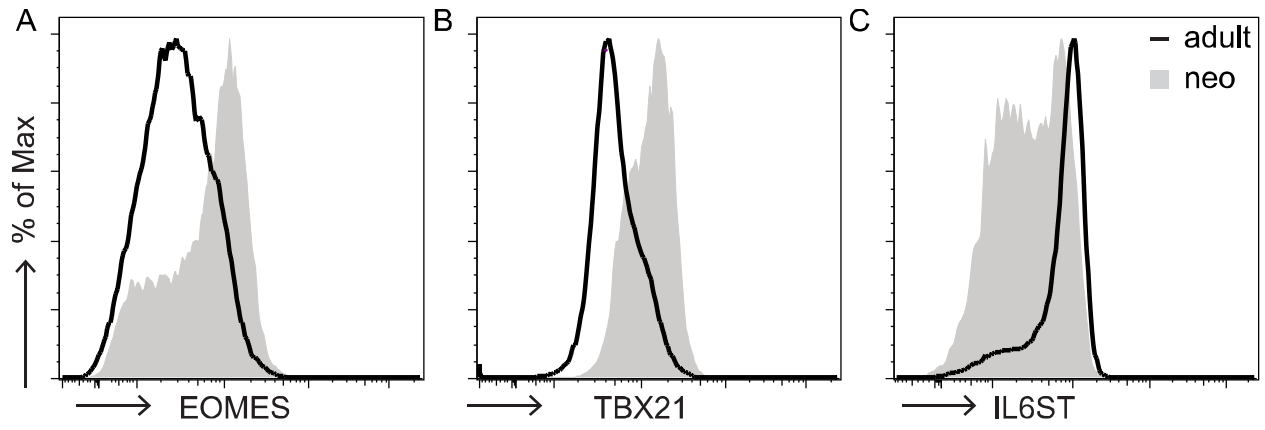

**Figure S6 Representative flow cytometry plots.** Protein expression in naive adult and neonatal CD8<sup>+</sup> T cells of EOMES (A), TBX21 (B), and IL6ST (C) were quantified by flow cytometry.
