# Supplementary material
Source: PubMed Central journal article supplement (PMC4649632)
Supplement: supp_115.179176_FigureS8.pdf [file supp_115.179176_FigureS8.pdf]

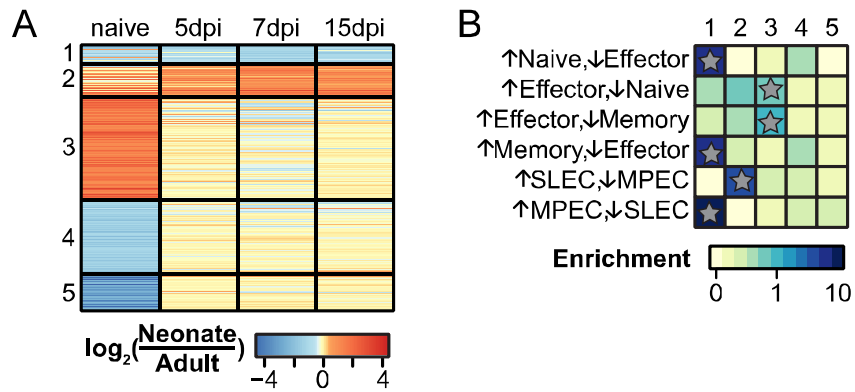

**Figure S8 Clustering gene expression differences between adults and neonates.** (A) Clustering of co-regulated genes in neonatal and adult CD8+ T cell transcriptomes. Fold-change differences for genes with significant differential expression between adults and neonates were calculated, and fold-differences used to cluster co-regulated groups of genes (as described in Figure 6); see also File S7. (B) Genes in each cluster were compared to genes that define naive, effector, memory cells, MPEC, or SLEC cells. Enrichment was calculated as number of genes in each cluster as compared to the number expected. Significance was determined by Fisher exact tests, \* $p < 10^{-4}$ .
