# Supplementary material
Source: PubMed Central journal article supplement (PMC4649632)
Supplement: supp_115.179176_FigureS9.pdf [file supp_115.179176_FigureS9.pdf]

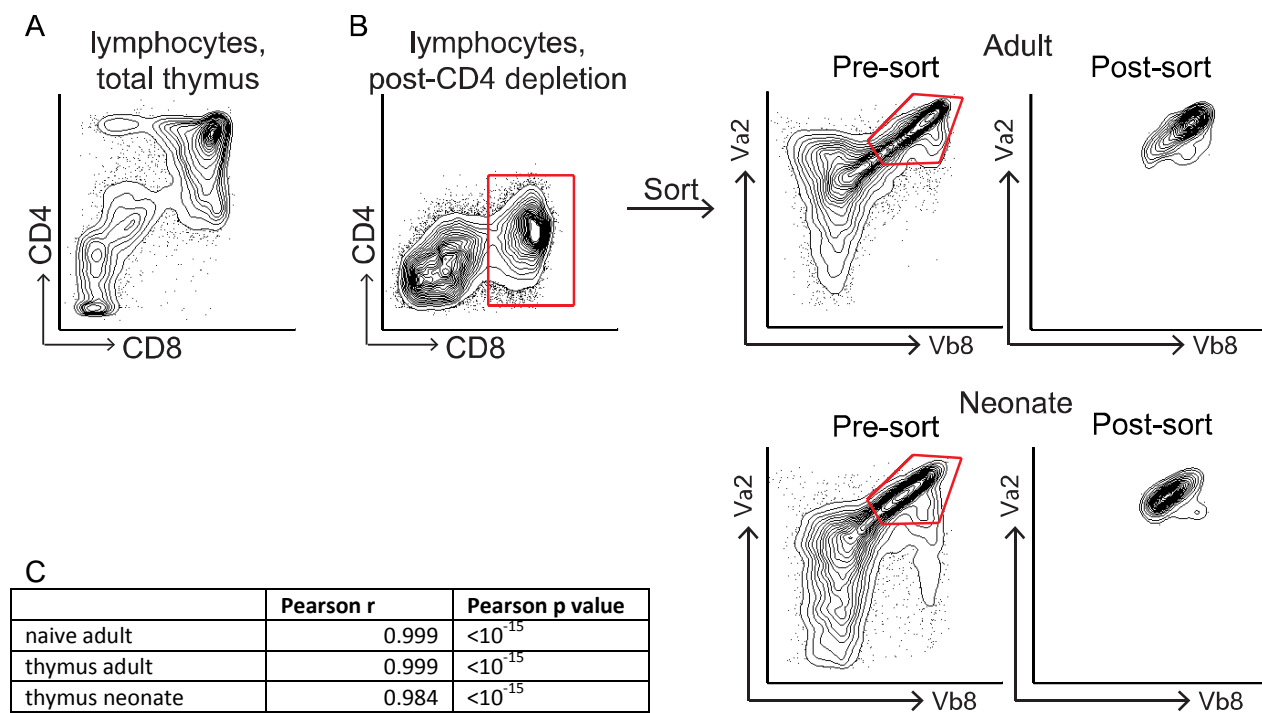

**Figure S9 Thymus cells.** (A) Distribution of CD4+ and CD8+ T cells in thymus. (B) Sorting strategy. Thymic cells were depleted of CD4+ cells, then Va2+ Vb8+ cells were FACS sorted to >90% purity. The sorted populations are shown in red boxes. (C) Pearson correlation coefficients for biological replicate miRNA sequencing data.
