# Supplementary material
Source: PubMed Central journal article supplement (PMC4649632)
Supplement: supp_115.179176_FigureS10.pdf [file supp_115.179176_FigureS10.pdf]

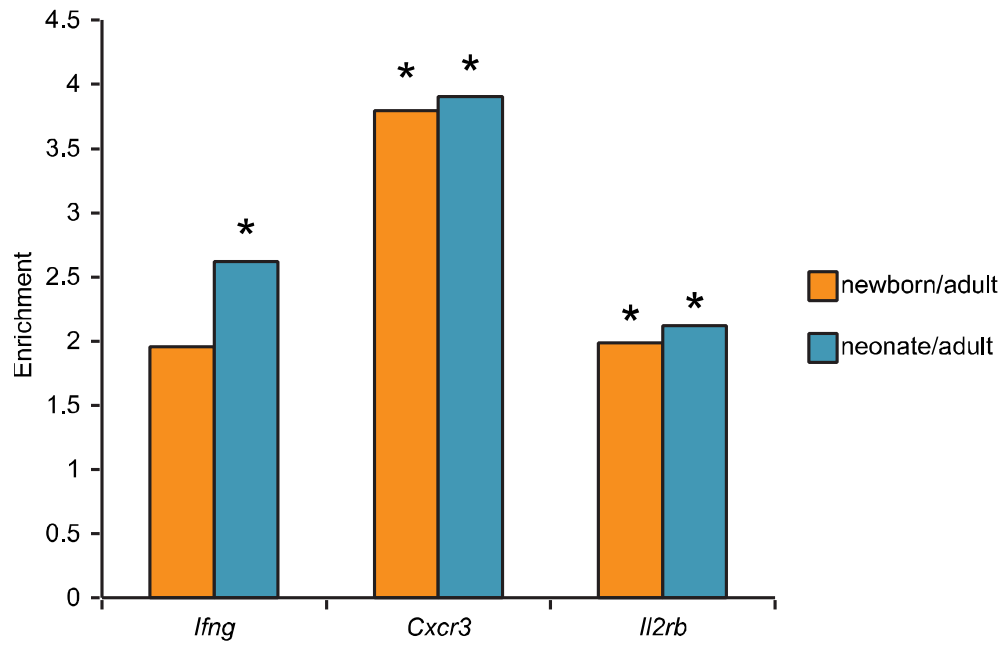

**Figure S10 Expression differences for genes regulated by *Tbx21* and *Eomes*.** Fold-change differences for genes were calculated between newborn/neonate and adults; \*Benjamini-Hochberg corrected  $p < 0.05$ .
